# Supplementary material for: Longitudinal Plasma Proteomics-Derived Biomarkers Predict Response to MET Inhibitors for MET-Dysregulated NSCLC
Source: MDPI journal article supplement (doi:10.3390/cancers15010302), 2023-01-01
Supplement: s1 [file s1]

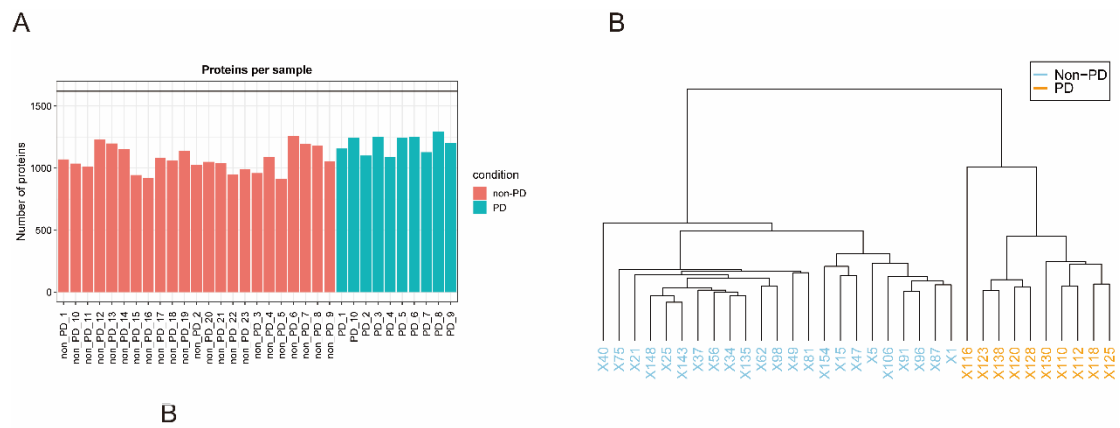

Figure S1: (A) Bar plot for the detected numbers of each sample at baseline. (B) Hierarchical cluster of the samples at baseline.

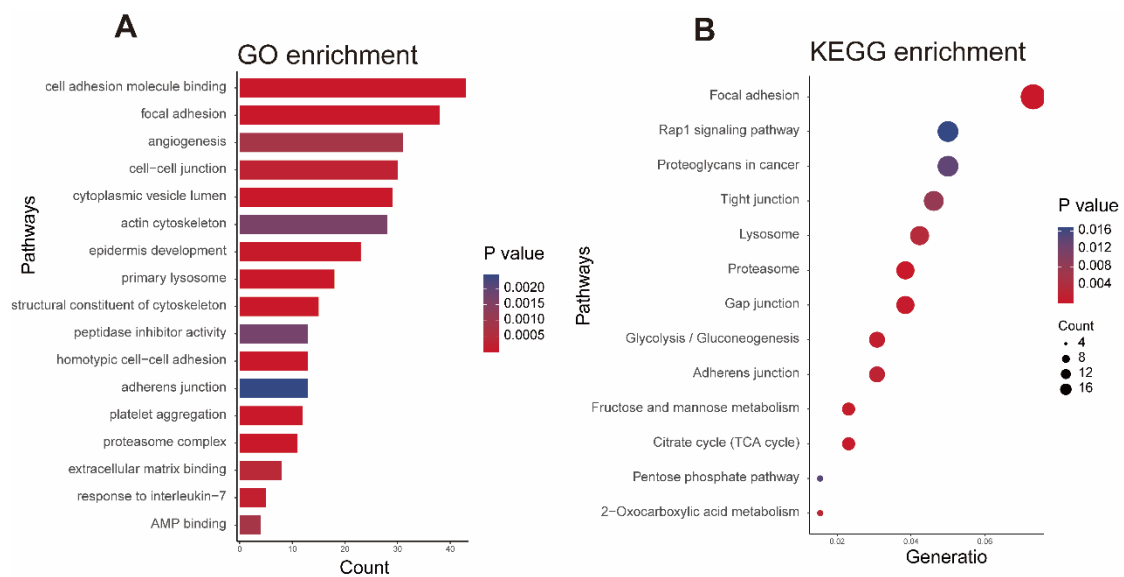

Figure S2: GO and KEGG enrichment analyses of differentially expressed proteins between the PD and non-PD groups.

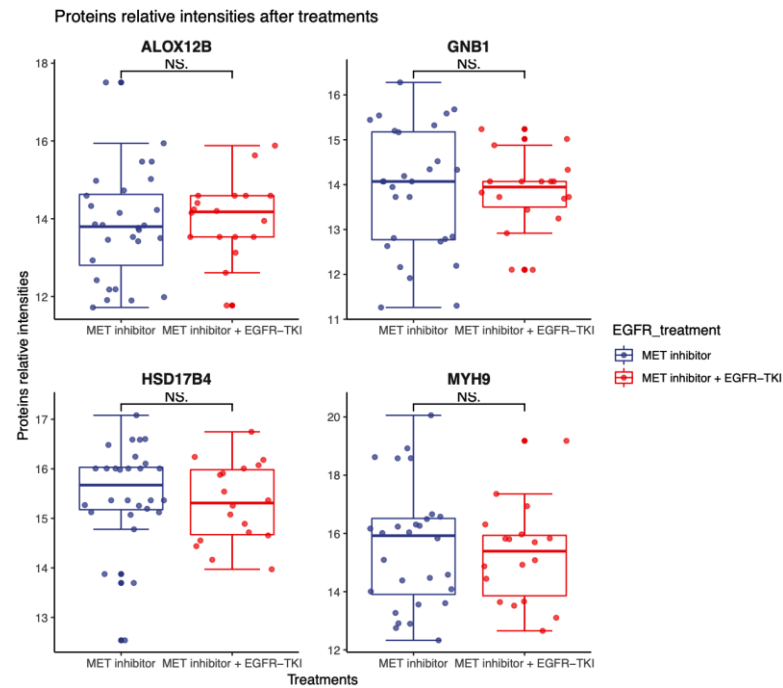

Figure S3. The relative intensities of four protein biomarkers between patients treated with MET inhibitor with or without EGFR-TKI.

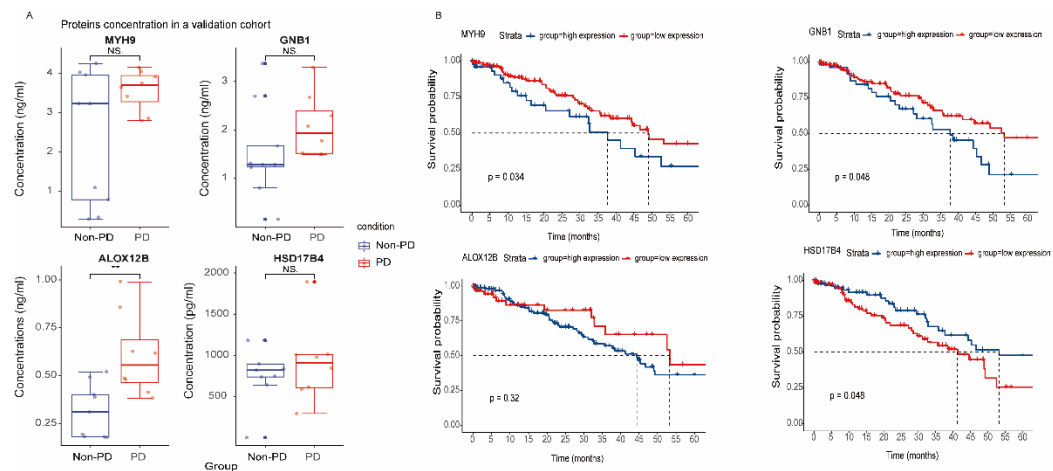

Figure S4: (A) The concentrations of four proteins in the validation group using ELISA method. (B) The prognostic values of four proteins for overall survival in TCGA dataset.

Table S1. The clinicopathological characteristics and treatment strategies of the enrolled patients based on the PD and non-PD groups.

| Clinical characteristics        | Non-PD group<br>n=23 (%) | PD group<br>n=10 (%) | P<br>value |
|---------------------------------|--------------------------|----------------------|------------|
| Age                             |                          |                      | 0.829      |
| Median [Range]                  | 57.9 (31.9, 67.9)        | 56.8 (29.3, 73.5)    |            |
| Gender (%)                      |                          |                      | 1          |
| Female                          | 6 (26.1)                 | 2 (20.0)             |            |
| Male                            | 17 (73.9)                | 8 (80.0)             |            |
| Smoking history(%)              |                          |                      | 1          |
| No                              | 10 (43.5)                | 4 (40.0)             |            |
| Yes                             | 13 (56.5)                | 6 (60.0)             |            |
| Pathology (%)                   |                          |                      | 1          |
| Adenocarcinoma                  | 22 (95.7)                | 10 (100.0)           |            |
| Pulmonary sarcomatoid carcinoma | 1 (4.3)                  | 0 (0.0)              |            |
| Stage (%)                       |                          |                      | 1          |
| III                             | 1 (4.3)                  | 0 (0.0)              |            |
| IV                              | 22 (95.7)                | 10 (100.0)           |            |
| Performance status score (%)    |                          |                      | 1          |
| 1                               | 22 (95.7)                | 10 (100.0)           |            |
| 2                               | 1 (4.3)                  | 0 (0.0)              |            |
| Brain metastasis (%)            |                          |                      | 1          |
| No                              | 16 (69.6)                | 7 (70.0)             |            |
| Yes                             | 7 (30.4)                 | 3 (30.0)             |            |
| EGFR mutation (%)               |                          |                      | 0.1        |
| 19DEL                           | 5 (21.7)                 | 0                    |            |
| L858R                           | 7 (30.4)                 | 1 (10.0)             |            |
| Negative                        | 11 (47.8)                | 9 (90.0)             |            |
| MET FISH (%)                    |                          |                      | 0.035      |
| Negative                        | 2 (8.7)                  | 5 (50)               |            |
| Positive                        | 15 (65.2)                | 1 (10)               |            |
| NA                              | 6 (26.1)                 | 4 (40.0)             |            |
| MET IHC (%)                     |                          |                      | 0.006      |
| Negative                        | 4 (17.4)                 | 7 (70.0)             |            |
| Positive                        | 19 (82.6)                | 3 (30.0)             |            |
| Treatment (%)                   |                          |                      | 0.054      |
| MET inhibitor + EGFR-TKI        | 11 (47.8)                | 1 (10.0)             |            |
| MET inhibitor                   | 12 (52.2)                | 9 (90.0)             |            |
| Treatment line (%)              |                          |                      | 0.3968     |
| 1                               | 6 (26.1)                 | 1 (10.0)             |            |
| ≥2                              | 17 (73.9)                | 9 (90.0)             |            |

NA, not applicable

Table S2: Disease control rates and objective response rates in groups stratified by different models.

|                               | Disease control rate |                    | Objective response rate |                          |
|-------------------------------|----------------------|--------------------|-------------------------|--------------------------|
|                               | Positive/Low-risk    | Negative/High risk | Positive/Low-risk       | Negative/High risk group |
|                               | group                | group              | group                   |                          |
| FISH                          | 93.8%                | 28.6%              | 68.8%                   | 28.6%                    |
| IHC                           | 86.4%                | 36.4%              | 69.6%                   | 9.1%                     |
| Four-protein signature        | 95.7%                | 10.0%              | 69.6%                   | 10.0%                    |
| FISH + Four-protein signature | 94.4%                | 0.0%               | 72.2%                   | 0.0%                     |
| IHC + Four-protein signature  | 95.7%                | 10.0%              | 73.9%                   | 0.0%                     |

Table S3: The clinicopathologic characteristics and treatment strategies of the enrolled patients in the validation cohort.

|                              | Non-PD         | PD             |         |
|------------------------------|----------------|----------------|---------|
| Clinical characteristics     | n=11 (%)       | n=6 (%)        | P value |
| Age                          |                |                | 0.96    |
| Median [Range]               | 57.00 [46, 76] | 61.00 [48, 78] |         |
| Gender (%)                   |                |                | 0.102   |
| Female                       | 5 (45.5)       | 0 (0.0)        |         |
| Male                         | 6 (54.5)       | 6 (100.0)      |         |
| Smoking history (%)          |                |                | 0.6     |
| No                           | 8 (72.7)       | 3 (50.0)       |         |
| Yes                          | 3 (27.3)       | 3 (50.0)       |         |
| Pathology (%)                |                |                | 1       |
| Adenocarcinoma               | 10 (90.9)      | 6 (100.0)      |         |
| Adenosquamous carcinoma      | 1 (9.1)        | 0 (0.0)        |         |
| Stage (%)                    |                |                | -       |
| IV                           | 11 (100.0)     | 6 (100.0)      |         |
| Performance status score (%) |                |                | 0.676   |
| 1                            | 8 (72.7)       | 6 (100.0)      |         |
| 2                            | 2 (18.2)       | 0 (0.0)        |         |
| 3                            | 1 (9.1)        | 0 (0.0)        |         |
| Brain metastasis (%)         |                |                | 0.304   |
| No                           | 5 (45.5)       | 5 (83.3)       |         |
| Yes                          | 6 (54.5)       | 1 (16.7)       |         |
| EGFR mutation (%)            |                |                | 0.43    |
| 19DEL                        | 5 (45.5)       | 3 (50.0)       |         |
| L858R                        | 6 (54.5)       | 2 (33.3)       |         |
| Negative                     | 0 (0.0)        | 1 (16.7)       |         |
| MET FISH (%)                 |                |                | 0.076   |
| Negative                     | 5 (45.5)       | 0 (0.0)        |         |
| Positive                     | 3 (27.3)       | 1 (16.7)       |         |
| NA                           | 3 (27.3)       | 5 (83.3)       |         |
| MET IHC (%)                  |                |                | 0.017   |
| Negative                     | 6 (54.5)       | 3 (50.0)       |         |
| Positive                     | 5 (45.5)       | 0 (0.0)        |         |
| NA                           | 0 (0.0)        | 3 (50.0)       |         |
| Treatment (%)                |                |                | 0.28    |
| MET inhibitor + EGFR-TKI     | 2 (18.2)       | 3 (50.0)       |         |
| MET inhibitor                | 9 (81.8)       | 3 (50.0)       |         |
| Treatment line (%)           |                |                | 1       |
| 1                            | 3 (27.3)       | 1 (16.7)       |         |
| ≥2                           | 8 (72.7)       | 5 (83.3)       |         |

NA: not applicable
